# Supplementary material for: Outcomes and Challenges in the Programmatic Implementation of Tuberculosis Preventive Therapy among Household Contacts of Pulmonary TB Patients: A Mixed-Methods Study from a Rural District of Karnataka, India
Source: MDPI journal article supplement (doi:10.3390/tropicalmed8120512), 2023-11-30
Supplement: s1 [file s1]

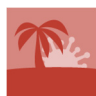

**Table S1.** Data collection form (Programme data).

| Variable                                            | Possible values                      |
|-----------------------------------------------------|--------------------------------------|
| NIKSHAY ID                                          |                                      |
| TB Unit                                             |                                      |
| Name of case                                        |                                      |
| Gender of case                                      | 1: Male                              |
|                                                     | 2: Female                            |
|                                                     | 3: TG                                |
|                                                     | 9: Not recorded                      |
| Age of case                                         | 1 to 100,999:                        |
| Mobile number of the patient                        |                                      |
| Type of case                                        | 1: New                               |
|                                                     | 2: Recurrent                         |
|                                                     | 3: Transferred in                    |
|                                                     | 4: Treatment after failure           |
|                                                     | 5: Treatment after loss to follow up |
|                                                     | 6: Other previously treated          |
|                                                     | 9: Not recorded                      |
| No. of U5 household contacts                        |                                      |
| No. of U5 household contacts screened               |                                      |
| No. of U5 household contacts with TB symptoms       |                                      |
| No. of U5 household contacts evaluated              |                                      |
| No. of U5 household contacts diagnosed with TB      |                                      |
| No. of U5 household contacts put on TB treatment    |                                      |
| No. of U5 household contacts eligible for TPT       |                                      |
| No. of U5 household contacts initiated on TPT       |                                      |
| No. of Other household contacts                     |                                      |
| No. of Other household contacts screened            |                                      |
| No. of Other household contacts with TB symptoms    |                                      |
| No. of Other household contacts evaluated           |                                      |
| No. of Other household contacts diagnosed with TB   |                                      |
| No. of Other household contacts put on TB treatment |                                      |
| No. of Other household contacts eligible for TPT    |                                      |
| No. of Other household contacts initiated on TPT    |                                      |

**Table S2.** Data collection form (telephone calls).

| Variable                                                                    | Possible values |
|-----------------------------------------------------------------------------|-----------------|
| NIKSHAY ID of index case                                                    |                 |
| Name of the index case                                                      |                 |
| Name of HHC                                                                 |                 |
| Was the HHC a part of the household at the time of detection of index case? | 0:No            |
|                                                                             | 1:Yes           |
|                                                                             | 9:Do not recall |
| Age of HHC                                                                  | 0 to 100, 999:  |
| Sex of HHC                                                                  | 1:Male          |
|                                                                             | 2:Female        |

|                                                                                   |                      |
|-----------------------------------------------------------------------------------|----------------------|
|                                                                                   | 3: TG                |
|                                                                                   | 0: No                |
| Was the HHC severely ill/hospitalised at the time of detection of index case?     | 1: Yes               |
|                                                                                   | 8: Not applicable    |
|                                                                                   | 9: Do not recall     |
|                                                                                   | 0: No                |
| Was the HHC pregnant/lactating at the time of detection of index case?            | 1: Yes               |
|                                                                                   | 8: Not applicable    |
|                                                                                   | 9: Do not recall     |
|                                                                                   | 0: No                |
| Did HHC have cough/fever/poor weight gain at the time of detection of index case? | 1: Yes               |
|                                                                                   | 8: Not applicable    |
|                                                                                   | 9: Do not recall     |
|                                                                                   | 0: No                |
| Was the HHC screened for these symptoms by an HCW?                                | 1: Yes               |
|                                                                                   | 8: Not applicable    |
|                                                                                   | 9: Do not recall     |
| Why was the HHC not screened?                                                     | 9: Not applicable    |
|                                                                                   | 0: No                |
| Was a diagnosis of active TB made after screening?                                | 1: Yes               |
|                                                                                   | 8: Not applicable    |
|                                                                                   | 9: Do not recall     |
|                                                                                   | 0: No                |
| Was TB treatment initiated?                                                       | 1: Yes               |
|                                                                                   | 8: Not applicable    |
|                                                                                   | 9: Do not recall     |
| Why was the TB treatment not initiated?                                           | 9: Not applicable    |
|                                                                                   | 1: Completed         |
|                                                                                   | 2: Ongoing           |
|                                                                                   | 3: Discontinued      |
|                                                                                   | 4: Loss to follow up |
| What is the status of TB treatment?                                               | 5: Died              |
|                                                                                   | 6: Failure           |
|                                                                                   | 7: Other             |
|                                                                                   | 8: Not applicable    |
|                                                                                   | 9: Do not recall     |
| Why was TB treatment not completed?                                               | 9: Not applicable    |
|                                                                                   | 0: No                |
| Was blood test taken?                                                             | 1: Yes               |
|                                                                                   | 8: Not applicable    |
|                                                                                   | 9: Do not recall     |
|                                                                                   | 0: No                |
| Was chest X-ray taken?                                                            | 1: Yes               |
|                                                                                   | 8: Not applicable    |
|                                                                                   | 9: Do not recall     |
|                                                                                   | 0: No                |
| Was TPT advised?                                                                  | 1: Yes               |
|                                                                                   | 8: Not applicable    |
|                                                                                   | 9: Do not recall     |

|                                    |                     |
|------------------------------------|---------------------|
| Was TPT initiated?                 | 0:No                |
|                                    | 1:Yes               |
|                                    | 8:Not applicable    |
| Why was the TPT not initiated?     | 9:Do not recall     |
|                                    | :9=Not applicable   |
|                                    | 1:Completed         |
| What is the current status of TPT? | 2:Ongoing           |
|                                    | 3:Discontinued      |
|                                    | 4:Loss to follow up |
|                                    | 5:Died              |
|                                    | 6:Failure           |
|                                    | 7:Other             |
|                                    | 8:Not applicable    |
| Why was TPT not completed?         | 9:Do not recall     |

**Table S3.** In-depth interview guide for index case/HHC.

|                                                                                                                                                                                                                                                                                                                                                                                                                                                                                                                                                                                                                                                                                                                                                                                                                                                                                                                                                                                                                                                                                                                                                                                                                                                                                                                                                                                                                                                                                                            |                            |
|------------------------------------------------------------------------------------------------------------------------------------------------------------------------------------------------------------------------------------------------------------------------------------------------------------------------------------------------------------------------------------------------------------------------------------------------------------------------------------------------------------------------------------------------------------------------------------------------------------------------------------------------------------------------------------------------------------------------------------------------------------------------------------------------------------------------------------------------------------------------------------------------------------------------------------------------------------------------------------------------------------------------------------------------------------------------------------------------------------------------------------------------------------------------------------------------------------------------------------------------------------------------------------------------------------------------------------------------------------------------------------------------------------------------------------------------------------------------------------------------------------|----------------------------|
| Participant: Case/HHC                                                                                                                                                                                                                                                                                                                                                                                                                                                                                                                                                                                                                                                                                                                                                                                                                                                                                                                                                                                                                                                                                                                                                                                                                                                                                                                                                                                                                                                                                      |                            |
| Current status of TB treatment/ TPT:                                                                                                                                                                                                                                                                                                                                                                                                                                                                                                                                                                                                                                                                                                                                                                                                                                                                                                                                                                                                                                                                                                                                                                                                                                                                                                                                                                                                                                                                       |                            |
| Age of the participant:                                                                                                                                                                                                                                                                                                                                                                                                                                                                                                                                                                                                                                                                                                                                                                                                                                                                                                                                                                                                                                                                                                                                                                                                                                                                                                                                                                                                                                                                                    | Gender of the participant: |
| Date of interview                                                                                                                                                                                                                                                                                                                                                                                                                                                                                                                                                                                                                                                                                                                                                                                                                                                                                                                                                                                                                                                                                                                                                                                                                                                                                                                                                                                                                                                                                          | Name of the interviewer:   |
| After a brief introduction of the project describing its purpose, written informed consent will be sought from the participants to participate in the study. Consent will also be sought to audio record the interview.                                                                                                                                                                                                                                                                                                                                                                                                                                                                                                                                                                                                                                                                                                                                                                                                                                                                                                                                                                                                                                                                                                                                                                                                                                                                                    |                            |
| <ul style="list-style-type: none"> <li>Can you describe the events that led up to the diagnosis of TB? (Probe–symptoms, hospitalisations, doctor visits, household contacts involved in care).</li> <li>How was the family informed about the diagnosis of TB? (Probe–who informed, what was the reaction, what were the initial queries made, who addressed the queries, number of health worker contacts, who were there in the household).</li> <li>Can you describe how the family members were tested for TB? (Probe–who checked, where and when, what was explained to them before the procedure, was assistance of index case taken at any step).</li> <li>Were all HHCs screened and tested? (Probe–why/why not, any attempt later by HHC/HCW to complete screening, what was told after screening, what was understood by you).</li> <li>What are the uses of taking TPT? (Probe–source of information, perceived risk of TB).</li> <li>What do you think the problems in taking TPT are? (Probe–what is the source of the information, was any attempt to clarify the doubts made, how did the HCW respond to your decision).</li> <li>Why did you decide to take/not take TPT? (Probe–attempts of self-initiated actions to continue on TPT, where did you procure TPT from, ease or difficulty of doing so).</li> <li>What could have been done to improve the delivery of TPT to you/your household members? (Probe–delivery, enrolment, testing, interaction with health worker).</li> </ul> |                            |
| The interview will end after thanking the participant for their time and participation.                                                                                                                                                                                                                                                                                                                                                                                                                                                                                                                                                                                                                                                                                                                                                                                                                                                                                                                                                                                                                                                                                                                                                                                                                                                                                                                                                                                                                    |                            |

**Table S4.** Key Informant Interview guide used for healthcare providers.

|                                                                                                                                                                                                                         |                            |
|-------------------------------------------------------------------------------------------------------------------------------------------------------------------------------------------------------------------------|----------------------------|
| From the healthcare worker, data will be collected regarding:                                                                                                                                                           |                            |
| Years of experience of the participant in the NTEP (earlier RNTCP):                                                                                                                                                     |                            |
| Designation: Field level/supervisory level                                                                                                                                                                              |                            |
| Age of the participant:                                                                                                                                                                                                 | Gender of the participant: |
| Date of interview:                                                                                                                                                                                                      | Name of the interviewer:   |
| After a brief introduction of the project describing its purpose, written informed consent will be sought from the participants to participate in the study. Consent will also be sought to audio record the interview. |                            |

- 
- Can you describe the steps that you will take when a patient is diagnosed with TB?
  - How effective, is TPT according to you in preventing TB disease?
  - How do you plan the contact tracing? (who goes, what is the point of contact, how many times they may have to go, logistics availability)
  - What are the challenges that you face when you go for a house visit for screening? (Probe–experiences, hard to reach, resistant communities, unavailability of the contact, transport of samples)
  - What are the usual responses of household members when they are told that someone in the family has TB?
  - How do you explain TB disease to them?
  - How do you explain TPT to household contacts?
  - What are the responses of household contacts when informed regarding TPT?
  - What are the common reasons for not initiating and discontinuation of TPT? (Probe–experiences)
  - What do you do when you have some household contact who is refusing to be screened?
  - What do you do when you have some household contact who is refusing to take the TPT? (probe–pregnant, lactating, children, old age)
  - When did you train/receive training for TPT? Did you find any challenge in the field that was not earlier explained to you in the training? Can you describe them in detail?
  - How can the system be improved to help you better cover TPT beneficiaries? (Probe–digital systems, counseling sessions, drug dose and composition, what will be the time and training required to adopt the solutions?)
- The interview will end after thanking the participant for their time and participation.
-
